# Supplementary material for: Encapsulation of biomimetic nanozymes in MOF matrices as peroxidase mimetics for sensitive detection of l-cysteine
Source: Royal Society of Chemistry journal article supplement (doi:10.1039/d4ay01844c), 2025-01-01
Supplement: d4ay01844c1.pdf [file d4ay01844c1.pdf]

## Supporting Information

### **Encapsulation of Biomimetic Nanozymes in MOF matrices as peroxidase mimetic for sensitive detection of L-cysteine**

Shaohong Zhang, Ran Zhang, Minzi Li, Hongying Wang, Zhijuan Wang\*

*Institute of Advanced Synthesis (IAS), School of Chemistry and Molecular Engineering (SCME), Nanjing Tech University, 30 South Puzhu Road, Nanjing 211816, PR China*

E-mail: [ias\\_zjwang@njtech.edu.cn](mailto:ias_zjwang@njtech.edu.cn)

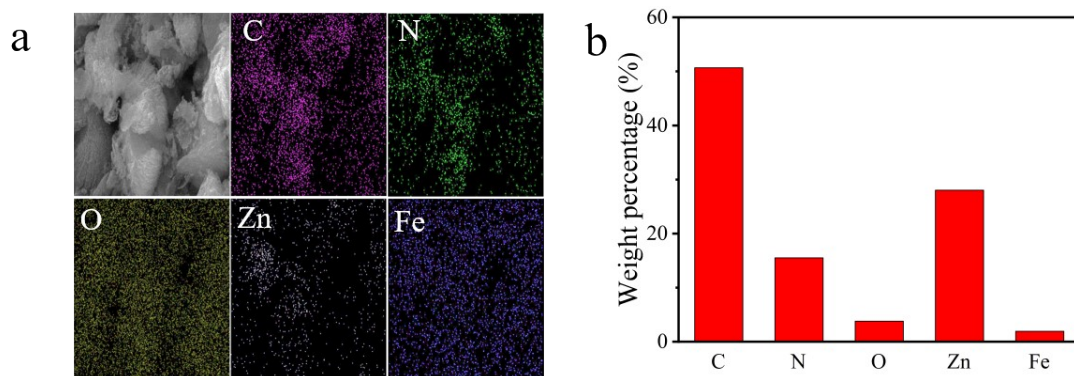

**Fig. S1** (a) EDS elemental mapping images and (b) the content of the corresponding elements of FH/hemin@ZIF-8.

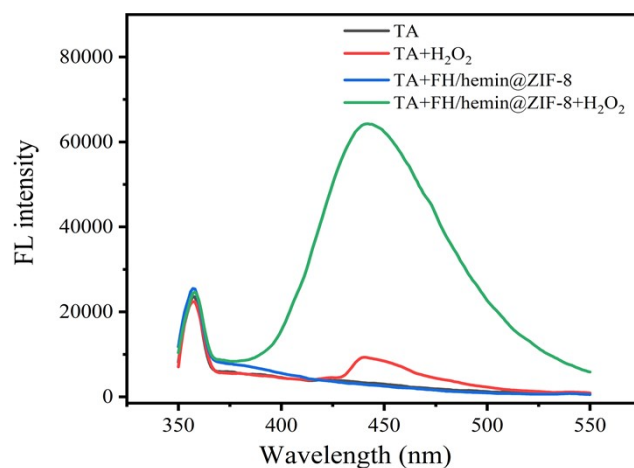

**Fig. S2** Fluorescence emission spectra of TA and TA in the presence of H<sub>2</sub>O<sub>2</sub>, FH/hemin@ZIF-8 and FH/hemin@ZIF-8+H<sub>2</sub>O<sub>2</sub>. Reaction conditions: 8.0 mg mL<sup>-1</sup> catalyst, 0.1 M acetate buffer (pH 3), 1 mM H<sub>2</sub>O<sub>2</sub>, 16.0 mM TA, room temperature for 90 minutes incubation.

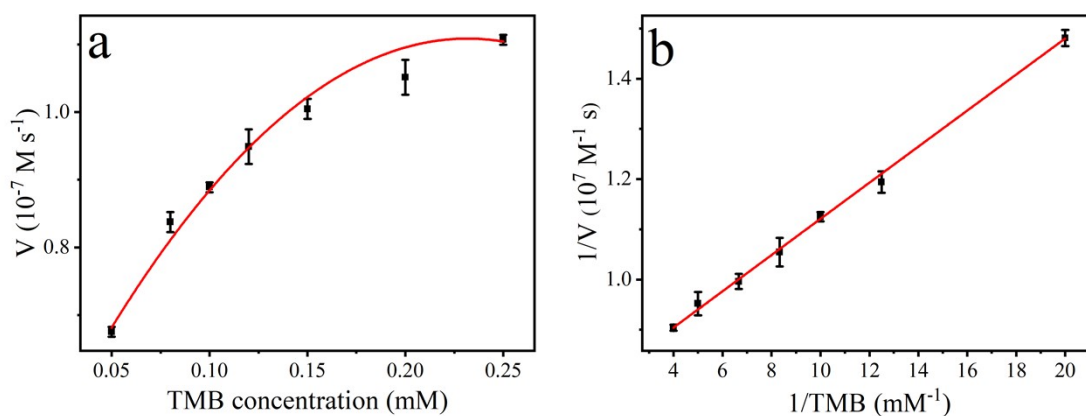

**Fig. S3** TMB catalytic kinetics assays of FH/hemin@ZIF-8. (a) Steady-state kinetics curves for TMB. (b) Double-reciprocal plot used to calculate the kinetic constants.

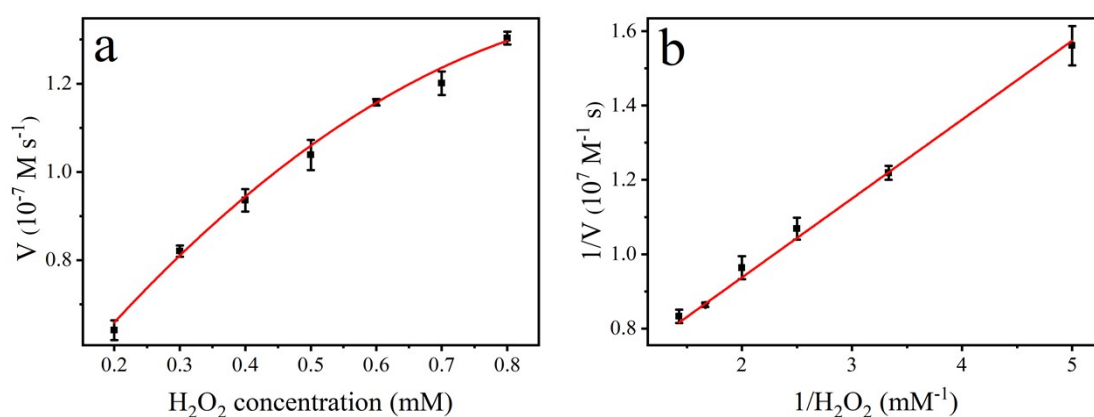

**Fig. S4**  $\text{H}_2\text{O}_2$  catalytic kinetics assays of FH/hemin@ZIF-8. (a) Steady-state kinetics curves for  $\text{H}_2\text{O}_2$ . (b) Double-reciprocal plots used to calculate the kinetic constants.

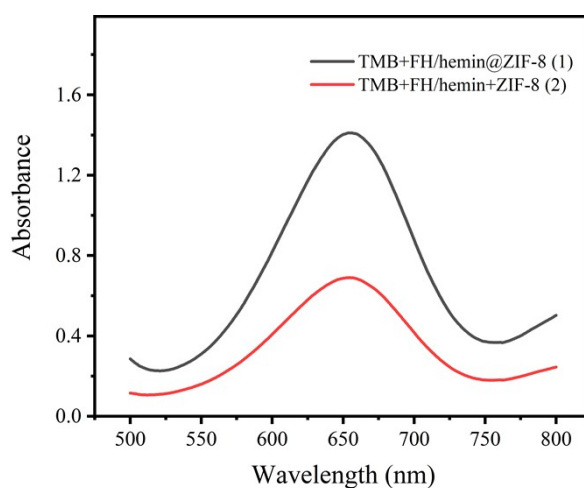

**Fig. S5** UV-vis absorption spectra of TMB in the presence of FH/hemin@ZIF-8 (1), and FH/hemin+ZIF-8 (2). Reaction conditions:  $8.0 \text{ mg mL}^{-1}$  catalyst,  $0.1 \text{ M}$  acetate buffer (pH 3),  $20.0 \text{ mM}$  TMB,  $1 \text{ mM}$   $\text{H}_2\text{O}_2$ ,  $60^\circ \text{C}$  for 5 min incubation.

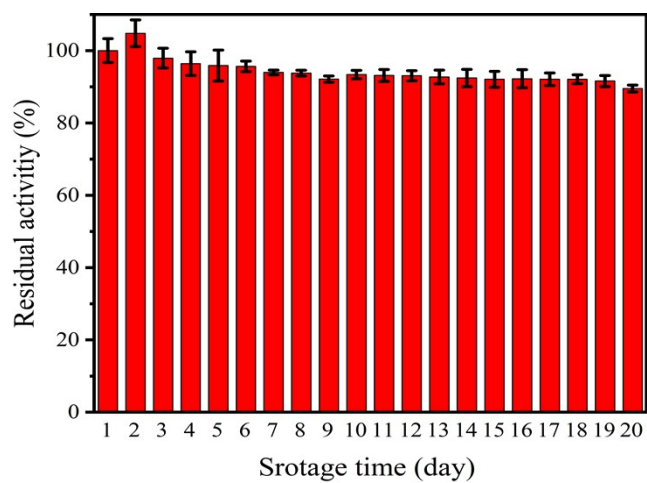

**Fig. S6** The storage stability of FH/hemin@ZIF-8 in acetate buffer solution and stored at 4 °C for 20 days. Reaction conditions: 8.0 mg mL<sup>-1</sup> catalyst, 0.1 M acetate buffer (pH 3), 20.0 mM TMB, 1 mM H<sub>2</sub>O<sub>2</sub>, 60 °C for 5 min incubation.

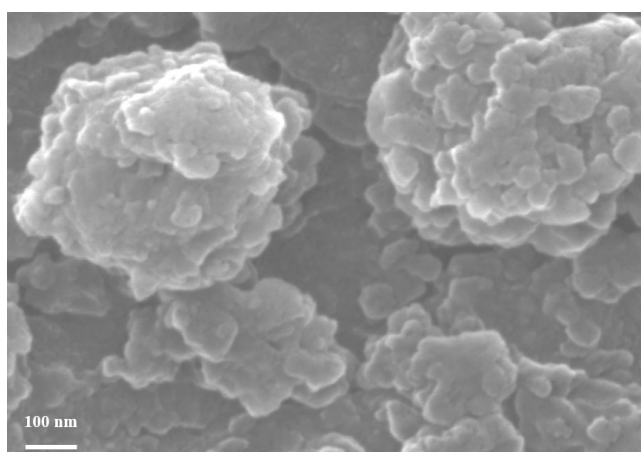

**Fig. S7** SEM image of FH/hemin@ZIF-8 after the catalytic reaction.
